# Supplementary material
Source: PubMed Central journal article supplement (PMC1142536)
Supplement: 7600609s3.pdf [file 7600609s3.pdf]

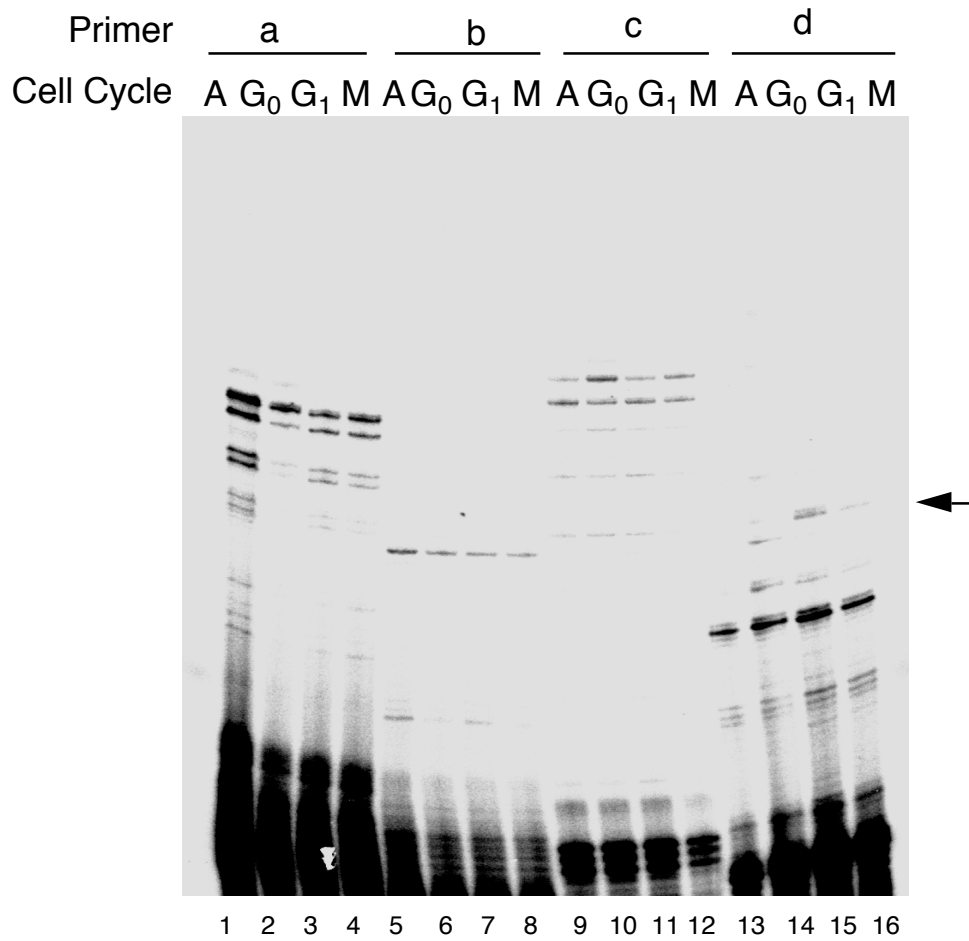

**Supplemental Figure 3. Cell cycle analysis of nucleosome borders at DS.** Primer extension assay of mononucleosomal DNA isolated from Raji cells that were grown in asynchronous (A) cultures, or arrested in the cell cycle with serum starvation (G<sub>0</sub>), mimosine (G<sub>1</sub>), or colchicine (M). Primers used for primer extension a (lane 5), b (lane 6), c (lane 7), and d (lane 8) are indicated above. Sequencing reactions are indicated in lanes 1-4.
